# Supplementary material for: An intracellular in situ assembly of ultrasmall nanoparticles as drug depots for enhanced chemotherapy
Source: Royal Society of Chemistry journal article supplement (doi:10.1039/d3nj04530g), 2023-01-01
Supplement: d3nj04530g1.pdf [file d3nj04530g1.pdf]

## Supporting information

# Intracellular In Situ Assembly of Albumin-based Nanoparticles as Drug Depots for Enhanced Anti-B- cell lymphoma Chemotherapy

Liandong Feng,<sup>a</sup> Zhiyou Chen,<sup>b</sup> Wei Dong,<sup>c</sup> Aming Xie,<sup>d</sup> Xiaowei Zang,<sup>e</sup> and Juan Li<sup>\*a</sup>

<sup>a</sup> Phase I Clinical Trials Unit, Nanjing Drum Tower Hospital, The Affiliated Hospital of Nanjing University Medical School, Nanjing 210008, P. R. China.

<sup>b</sup> Nanjing Drum Tower Hospital Clinical College of Nanjing University of Chinese Medicine, Nanjing 210023, P. R. China.

<sup>c</sup> School of Chemistry and Chemical Engineering, Nanjing University of Science & Technology, Nanjing, 210094, P. R. China.

<sup>d</sup> School of Mechanical Engineering, Nanjing University of Science & Technology, Nanjing 210094, P. R. China

<sup>e</sup> College of Safety Science and Engineering, Nanjing Tech University, Nanjing 211816, P. R. China

Corresponding Author (\*)

Email for correspondence: [juanli2003@njglyy.com](mailto:juanli2003@njglyy.com)

## Contents

**Figure S1.** Optimization of TCEP concentration by monitoring size changes of DOX-uNPs.

**Figure S2.** Stability of DOX-uNPs in PBS at 37 °C.

**Figure S3.** Absorption and fluorescent spectra of DOX-uNPs and Cy5.5-DOX-uNPs.

**Figure S4.** Quantitative analysis of fluorescent intensity of A20 cells from flow cytometric plot Figure 4B.

**Figure S5.** Cell viability of A) OCI-LY-3 and B) SU-DHL-4 treated with free DOX or DOX-uNPs for 72 h.

**Figure S6.** A) Ex vivo imaging tumors and major organs post 8 h, 24 h, and 48 h of i.v. injection of Cy5.5-DOX-uNPs. B) quantitative analysis of Cy5.5 fluorescent intensity from A).

**Figure S7.** Weight change of mice treated with various formulations.

**Figure S8.** H&E staining sections of heart, liver, spleen, lung, and kidney, collected at the end of anti-tumor study. The mice were i.v. injected with PBS, free DOX and DOX-uNPs at the same DOX dose of 2 mg/kg.

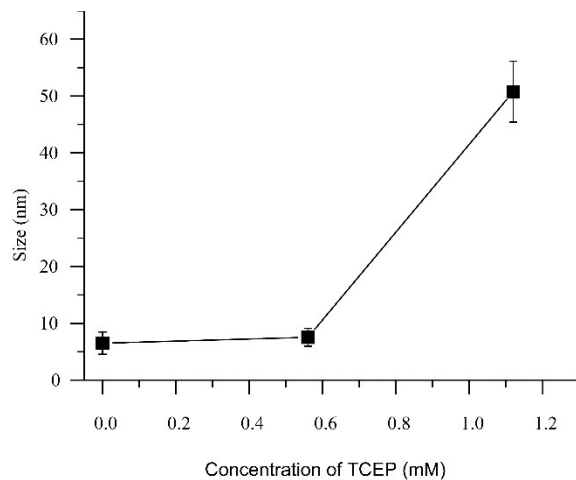

**Figure S1.** Optimization of TCEP concentration by monitoring size changes of DOX-uNPs.

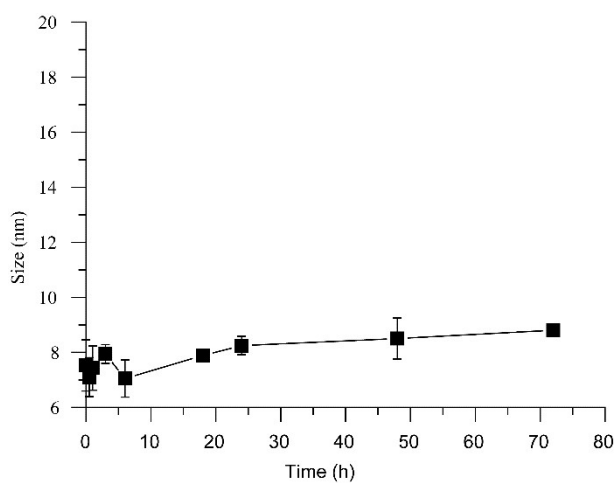

**Figure S2.** Stability of DOX-uNPs in PBS at 37 °C.

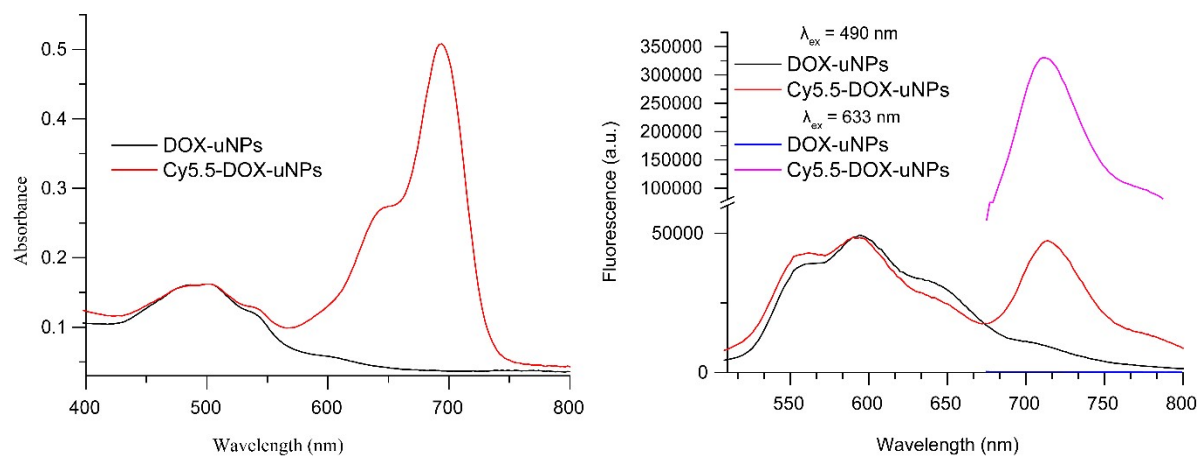

**Figure S3.** Absorption and fluorescent spectra of DOX-uNPs and Cy5.5-DOX-uNPs.

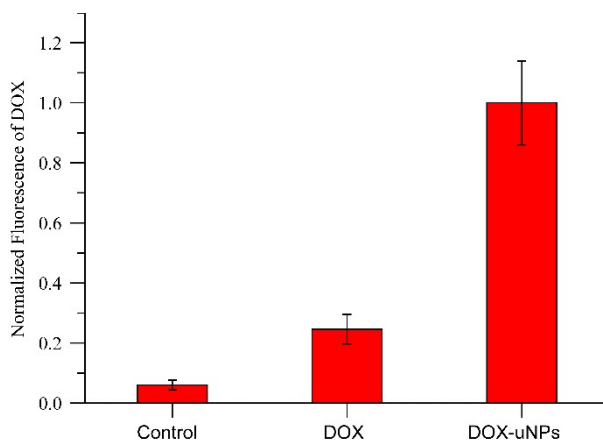

**Figure S4.** Quantitative analysis of fluorescent intensity of A20 cells from flow cytometric plot Figure 4B.

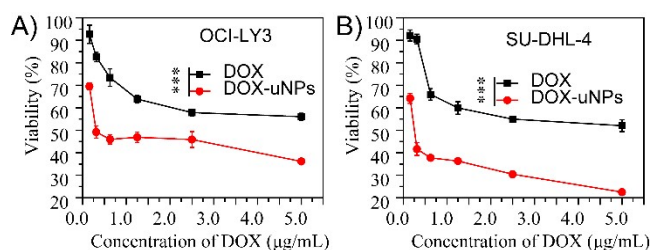

**Figure S5.** Cell viability of A) OCI-LY-3 and B) SU-DHL-4 treated with free DOX or DOX-uNPs for 72 h.

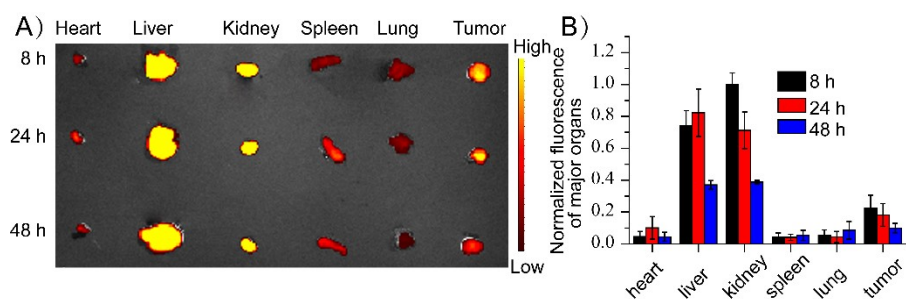

**Figure S6.** A) Ex vivo imaging tumors and major organs post 8 h, 24 h, and 48 h of i.v. injection of Cy5.5-DOX-uNPs. B) quantitative analysis of Cy5.5 fluorescent intensity from A).

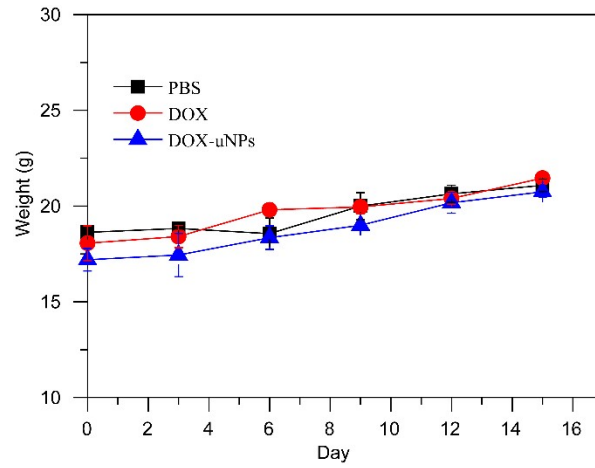

**Figure S7.** Weight change of mice treated with various formulations.

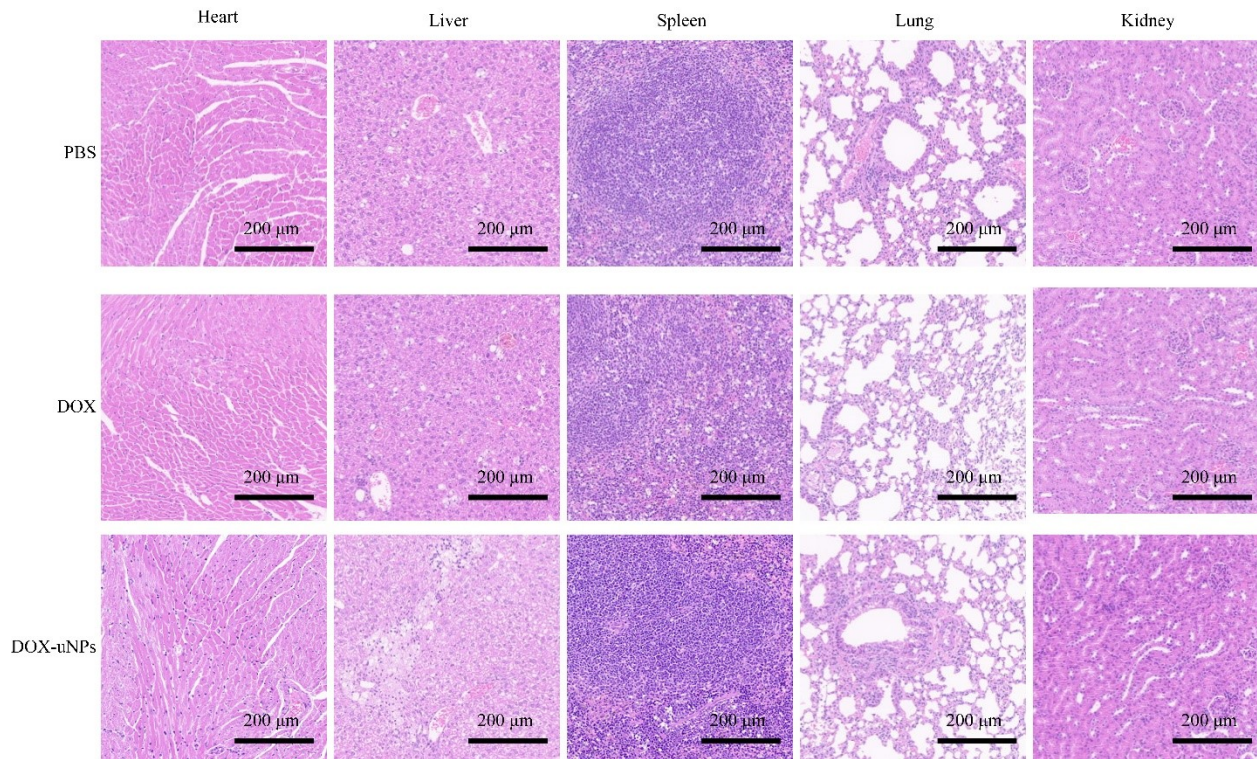

**Figure S8.** H&E staining sections of heart, liver, spleen, lung, and kidney, collected at the end of anti-tumor study. The mice were i.v. injected with PBS, free DOX and DOX-uNPs at the same DOX dose of 2 mg/kg.
